# Supplementary material for: Distinct mechanisms define murine B cell lineage immunoglobulin heavy chain (IgH) repertoires
Source: eLife journal article supplement (doi:10.7554/elife.09083), 2015-09-30
Supplement: supp [file elife_poa_e09083_Figure_1_figure_supplement_2.pdf › elife_poa_e09083_Figure_1_figure_supplement_2.pdf]

## Figure 1-figure supplement 2

### A: V11-2 D2-6 J1

```
>M01518:53:000000000-A7MVN:1:1101:12630:6931 COPY:2116 mIGHV11-2*01[0] mIGHD2-6*01 mIGHJ1*03[0] mIGHM*03 MRYSNYWYFDV
T P G K T L E W I G D I N S D G S A I N Y A P S I K D R F T I F R D N D K S T L
. . . . . + . . . . +
acacctgggaagaccctggagtggattGGAGACATTAATTCTGATGGCAGTGCATAAACTACGCACCATCCATAAAGGATCGATTCACTATCTTCAGAGACAATGACAAGAGCACCCCTG
ACACCTGGGAAGACCCTGGAGTGGATTGGAGACATTAATTCTGATGGCAGTGCATAAACTACGCACCATCCATAAAGGATCGATTCACTATCTTCAGAGACAATGACAAGAGCACCCCTG

Y L Q M S N V R S E D T A T Y F C M R Y S N Y W Y F D V W G T G T T V T V S S E
. . . . + . . . . +
TACCTGCAGATGAGCAATGTGCGATCGGAGGACACAGCCACGTATTTCTGTATGAGATATAGTAACTACTGGTACTTCGATGTCTGGGGCACAGGGACCACGGTCACCGTCTCCTCAGAG
TACCTGCAGATGAGCAATGTGCGATCGGAGGACACAGCCACGTATTTCTGTATGAGATATAGTAACTACTGGTACTTCGATGTCTGGGGCACAGGGACCACGGTCACCGTCTCCTCAGAG
```

### B: V11-2 D2-8 J1

```
>M01518:53:000000000-A7MVN:1:1103:15890:4689 COPY:138 mIGHV11-2*01[0] mIGHD2-8*01 mIGHJ1*03[0] mIGHM*03 MRYGNYWYFDV
T P G K T L E W I G D I N S D G S A I N Y A P S I K D R F T I F R D N D K S T L
. . . . . + . . . . +
acacctgggaagaccctggagtggattGGAGACATTAATTCTGATGGCAGTGCATAAACTACGCACCATCCATAAAGGATCGATTCACTATCTTCAGAGACAATGACAAGAGCACCCCTG
ACACCTGGGAAGACCCTGGAGTGGATTGGAGACATTAATTCTGATGGCAGTGCATAAACTACGCACCATCCATAAAGGATCGATTCACTATCTTCAGAGACAATGACAAGAGCACCCCTG

Y L Q M S N V R S E D T A T Y F C M R Y G N Y W Y F D V W G T G T T V T V S S E
. . . . + . . . . +
TACCTGCAGATGAGCAATGTGCGATCGGAGGACACAGCCACGTATTTCTGTATGAGATATGGTAACTACTGGTACTTCGATGTCTGGGGCACAGGGACCACGGTCACCGTCTCCTCAGAG
TACCTGCAGATGAGCAATGTGCGATCGGAGGACACAGCCACGTATTTCTGTATGAGATATGGTAACTACTGGTACTTCGATGTCTGGGGCACAGGGACCACGGTCACCGTCTCCTCAGAG
```

### C: V11-2 D1-1 J1

```
>M01518:53:000000000-A7MVN:1:1101:10142:6844 COPY:1809 mIGHV11-2*01[0] mIGHD1-1*01 mIGHJ1*03[0] mIGHM*03 MRYGSSYWYFDV
T P G K T L E W I G D I N S D G S A I N Y A P S I K D R F T I F R D N D K S T L
. . . . . + . . . . +
acacctgggaagaccctggagtggattGAGACATTAATTCTGATGGCAGTGCATAAACTACGCACCATCCATAAAGGATCGATTCACTATCTTCAGAGACAATGACAAGAGCACCCCTG
ACACCTGGGAAGACCCTGGAGTGGATTGGAGACATTAATTCTGATGGCAGTGCATAAACTACGCACCATCCATAAAGGATCGATTCACTATCTTCAGAGACAATGACAAGAGCACCCCTG

Y L Q M S N V R S E D T A T Y F C M R Y G S S Y W Y F D V W G T G T T V T V S S
. . . . + . . . . +
TACCTGCAGATGAGCAATGTGCGATCGGAGGACACAGCCACGTATTTCTGTATGAGATACGGTAGTAGCTACTGGTACTTCGATGTCTGGGGCACAGGGACCACGGTCACCGTCTCCTCA
TACCTGCAGATGAGCAATGTGCGATCGGAGGACACAGCCACGTATTTCTGTATGAGATACGGTAGTAGCTACTGGTACTTCGATGTCTGGGGCACAGGGACCACGGTCACCGTCTCCTCA
```
