# Supplementary material for: Distinct mechanisms define murine B cell lineage immunoglobulin heavy chain (IgH) repertoires
Source: eLife journal article supplement (doi:10.7554/elife.09083), 2015-09-30
Supplement: supp [file elife_poa_e09083_Figure_3_figure_supplement_2.pdf › elife_poa_e09083_Figure_3_figure_supplement_2.pdf]

Figure 3-figure supplement 2

splenic B-1a #1

top 10 CDR3 sequences (old primers)

| CDR3 (peptide) | V domain  | J domain | Copy  |
|----------------|-----------|----------|-------|
| ASYDIYAMDY     | mIGHV1-26 | mIGHJ4   | 18787 |
| MRYSNYWYFDV    | mIGHV11-2 | mIGHJ1   | 16483 |
| AREGTYGSSPLDY  | mIGHV1-76 | mIGHJ2   | 12884 |
| ASYSFAY        | mIGHV1-50 | mIGHJ3   | 10907 |
| ARKELGRAHWCFDV | mIGHV1-55 | mIGHJ1   | 5908  |
| ARSEFAY        | mIGHV1-50 | mIGHJ3   | 5121  |
| TPGLGAY        | mIGHV6-6  | mIGHJ3   | 4717  |
| AHGYLDY        | mIGHV1-50 | mIGHJ2   | 4174  |
| ARTYGIRYWYFDV  | mIGHV1-76 | mIGHJ1   | 3467  |
| AHATEYYAMDY    | mIGHV14-3 | mIGHJ4   | 3399  |

top 10 CDR3 sequences (new primers)

| CDR3 (peptide) | V domain  | J domain | Copy  |
|----------------|-----------|----------|-------|
| MRYSNYWYFDV    | mIGHV11-2 | mIGHJ1   | 10429 |
| AREGTYGSSPLDY  | mIGHV1-76 | mIGHJ2   | 10387 |
| ASYDIYAMDY     | mIGHV1-26 | mIGHJ4   | 7805  |
| ASYSFAY        | mIGHV1-50 | mIGHJ3   | 6820  |
| ARKELGRAHWCFDV | mIGHV1-55 | mIGHJ1   | 4499  |
| TPGLGAY        | mIGHV6-6  | mIGHJ3   | 3094  |
| ARTYGIRYWYFDV  | mIGHV1-76 | mIGHJ1   | 2942  |
| AHGYLDY        | mIGHV1-50 | mIGHJ2   | 2918  |
| ARSEFAY        | mIGHV1-50 | mIGHJ3   | 2702  |
| AHATEYYAMDY    | mIGHV14-3 | mIGHJ4   | 2267  |

splenic B-1a #2

top 10 CDR3 sequences (old primers)

| CDR3 (peptide) | V domain  | J domain | Copy  |
|----------------|-----------|----------|-------|
| ASGGNYFSYFDY   | mIGHV1-26 | mIGHJ2   | 19808 |
| ARRYYGSSYWYFDV | mIGHV1-55 | mIGHJ1   | 15912 |
| TRSNYYGSRSDY   | mIGHV1-15 | mIGHJ2   | 13684 |
| ASGDYLYYFDY    | mIGHV1-84 | mIGHJ2   | 12377 |
| TDPPSDY        | mIGHV6-3  | mIGHJ2   | 11233 |
| ARTSSGSFDY     | mIGHV9-3  | mIGHJ2   | 10498 |
| ARRYYGSSYAMDY  | mIGHV1-50 | mIGHJ4   | 10411 |
| AVRRSSGSLDY    | mIGHV1-53 | mIGHJ2   | 9494  |
| ARATLYSNYAMDY  | mIGHV1-53 | mIGHJ4   | 9194  |
| ARLETGY        | mIGHV1-50 | mIGHJ2   | 7352  |

top 10 CDR3 sequences (new primers)

| CDR3 (peptide) | V domain  | J domain | Copy |
|----------------|-----------|----------|------|
| ASGGNYFSYFDY   | mIGHV1-26 | mIGHJ2   | 7548 |
| ARRYYGSSYWYFDV | mIGHV1-55 | mIGHJ1   | 6421 |
| ASGDYLYYFDY    | mIGHV1-84 | mIGHJ2   | 4943 |
| TRSNYYGSRSDY   | mIGHV1-15 | mIGHJ2   | 4127 |
| ARRYYGSSYAMDY  | mIGHV1-50 | mIGHJ4   | 3964 |
| AVRRSSGSLDY    | mIGHV1-53 | mIGHJ2   | 3456 |
| ARATLYSNYAMDY  | mIGHV1-53 | mIGHJ4   | 3000 |
| ARLETGY        | mIGHV1-50 | mIGHJ2   | 2944 |
| AYGYYHY        | mIGHV1-75 | mIGHJ2   | 2824 |
| TDPPSDY        | mIGHV6-3  | mIGHJ2   | 2808 |
