# Supplementary material for: Distinct mechanisms define murine B cell lineage immunoglobulin heavy chain (IgH) repertoires
Source: eLife journal article supplement (doi:10.7554/elife.09083), 2015-09-30
Supplement: supp [file elife_poa_e09083_Figure_6_figure_supplement_1.pdf › elife_poa_e09083_Figure_6_figure_supplement_1.pdf]

Figure 6-figure supplement 1

```
>M01518:46:000000000-A6JL1:1:1113:20340:8656 COPY:22 mIGHV1-53*01[2] mIGHD4-1*02 mIGHJ2*01[8] mIGHM*03 ANWDY
R H G Q G L E W I G N I N P S N G G T N Y N E K F K S K A T L T V D K S S S T A
. . . . .
aggcatggacaaggccttgagtggttggaatTTAATCCTAGCAATGGTGGTACTAACAATGAGAAGTTCAAGAGCAAGGCCACACTGACTGTAGACAAATCCTCCAGCACAGCC
AGGCCTGGACAAGGCCTTGAGTGGATTGGAATTTAATCCTAGCAATGGTGGTACTAACAATGAGAAGTTCAAGAGCAAGGCCACACTGACTGTAGACAAATCCTCCAGCACAGCC
. . . . .
Y M Q L S S L T S E D S A V Y Y C A N W D Y W G Q G T T L T V S S E S Q S F P N
. . . . .
TACATGCAGCTCAGCAGCCTGACATCTGAGGACTCTGCGGTCTATTATTGTGCAAACTGGGACTACTGGGGCCAAGGCACCCTCTCACAGTCTCCTCAGAGAGTCAGTCCTTCCCAAAT
TACATGCAGCTCAGCAGCCTGACATCTGAGGACTCTGCGGTCTATTATTGTGCAAACTGGGACTACTGGGGCCAAGGCACCCTCTCACAGTCTCCTCAGAGAGTCAGTCCTTCCCAAAT

>M01518:46:000000000-A6JL1:1:1112:18830:24201 COPY:21 mIGHV1-26*01[2] mIGHD4-1*02 mIGHJ2*01[8] mIGHM*03 ANWDY
H G K S L E W I G D I N P N N G G T S Y N Q K F K G K A T L T V D K S S S T A Y
. . . . .
ccatggaaagagccttgagtggttggaatTTAATCCTAACAATGGTGGTACTAGCTACAACCAGAAGTTCAAGGGCAAGGCCACATTGACTGTAGACAAGTCCTCCAGCACAGCCTA
CCATGGAAGAGCCTTGAGTGGATTGGAGATTTAATCCTAACAATGGTGGTACTAGCTACAACCAGAAGTTCAAGGGCAAGGCCACATTGACTGTAGACAAGTCCTCCAGCACAGCCTA
. . . . .
M E L R S L T S E D S A V Y Y C A N W D Y W G Q G T T L T V S S E S Q S F P N V
. . . . .
CATGGAGCTCCGCAGCCTGACATCTGAGGACTCTGCAGTCTATTACTGTGCAAACTGGGACTACTGGGGCCAAGGCACCCTCTCACAGTCTCCTCAGAGAGTCAGTCCTTCCaaatgt
CATGGAGCTCCGCAGCCTGACATCTGAGGACTCTGCAGTCTATTACTGTGCAAACTGGGACTACTGGGGCCAAGGCACCCTCTCACAGTCTCCTCAGAGAGTCAGTCCTTCCCAAATGT

>M01518:46:000000000-A6JL1:1:2111:23558:13100 COPY:11 mIGHV1-55*01[2] mIGHD4-1*02 mIGHJ2*01[8] mIGHM*03 ANWDY
K Q R P G Q G L E W I G D I Y P G S G S T N Y N E K F K S K A T L T V D T S S S
. . . . .
gaagcagaggcctgGACAAGGCCTTGAGTGGATTGGAGATTTATCCTGGTAGTGGTAGTACTAACAATGAGAAGTTCAAGAGCAAGGCCACACTGACTGTAGACACATCCTCCAG
GAAGCAGAGGCCTGGACAAGGCCTTGAGTGGATTGGAGATTTATCCTGGTAGTGGTAGTACTAACAATGAGAAGTTCAAGAGCAAGGCCACACTGACTGTAGACACATCCTCCAG
. . . . .
T A Y M Q L S S L T S E D S A V Y Y C A N W D Y W G Q G T T L T V S S E S Q S F
. . . . .
CACAGCCTACATGCAGCTCAGCAGCCTGACATCTGAGGACTCTGCGGTCTATTACTGTGCAAACTGGGACTACTGGGGCCAAGGCACCCTCTCACAGTCTCCTCAGAGAGTCAGTCCTT
CACAGCCTACATGCAGCTCAGCAGCCTGACATCTGAGGACTCTGCGGTCTATTACTGTGCAAACTGGGACTACTGGGGCCAAGGCACCCTCTCACAGTCTCCTCAGAGAGTCAGTCCTT

>M01518:46:000000000-A6JL1:1:2108:14928:21401 COPY:4 mIGHV14-3*01[2] mIGHD4-1*02 mIGHJ2*01[8] mIGHM*03 ANWDY
R P D Q G L E W I G R I D P A N G N T K Y A P K F Q G K A T I T A D T S S N T A
. . . . .
aggcctgacaggccttgagtggttggaatTTGATCCTGCGAATGGTAATACTAAATATGCCCGAAGTTCCAGGGCAAGGCCACTATAACTGCAGACACATCCTCCAACACAGCC
AGGCCTGAACAGGGCCTGGAGTGGATTGGAAGGTTGATCCTGCGAATGGTAATACTAAATATGCCCGAAGTTCCAGGGCAAGGCCACTATAACTGCAGACACATCCTCCAACACAGCC
. . . . .
Y L Q L S S L T S E D T A I Y Y C A N W D Y W G Q G T T L T V S S E S Q S F P N
. . . . .
TACCTGCAGCTCAGCAGCCTGACATCTGAGGACTGCCATCTATTACTGTGCTAACTGGGACTACTggggccaaggcaccactctcacagtctcctcagagagtcagtccttccaaat
TACCTGCAGCTCAGCAGCCTGACATCTGAGGACTGCCATCTATTACTGTGCTAACTGGGACTACTGGGGCCAAGGCACCCTCTCACAGTCTCCTCAGAGAGTCAGTCCTTCCCAAAT
```
