# Supplementary material for: Distinct mechanisms define murine B cell lineage immunoglobulin heavy chain (IgH) repertoires
Source: eLife journal article supplement (doi:10.7554/elife.09083), 2015-09-30
Supplement: supp [file elife_poa_e09083_Figure_7_figure_supplement_3.pdf › elife_poa_e09083_Figure_7_figure_supplement_3.pdf]

Figure 7-figure supplement 3

Data for IgH library using old primers

```
>M01518:44:000000000-AGWM4:1:2106:7311:19715 COPY:242 mIGHV1-55*01[0] mIGHD4-1*02 mIGHJ1*03[2] mIGHM*03 ARKELGRAHWCFDV
R H G Q G P E W I G D I Y P G S G T T N Y N E K F K S K A T L T V D T S S R T V
. . . . . + . . . . . + .
aggcatggacaaggccctgagtggtgattggagataTTATCCTGGTAGTGGTACTACTAACTACAATGAGAAGTTCAAGAGCAAGGCCCACTGACTGTAGACACATCCTCCAGAACAGTC
AGGCCTGGACAAGGCCTTGAGTGGATTGGAGATATTTATCCTGGTAGTGGTAGTACTAACTACAATGAGAAGTTCAAGAGCAAGGCCCACTGACTGTAGACACATCCTCCAGCACAGCC

Y M Q L S S L T S E D S A V Y Y C A R K E L G R A H W C F D V W G T G T T V T V
. . . . . + . . . . . + .
TACATGCAGCTCAGCAGCCTGACATCTGAGGACTCTGCGGTCTATTACTGTGCAAGAAAGGAAGTGGGGCGGGCTCACTGGTGCTTCGATGTCTGGGGCACAGGGACCACGGTCACCGTC
TACATGCAGCTCAGCAGCCTGACATCTGAGGACTCTGCGGTCTATTACTGTGCAAGA AACTGGG ACTGGTACTTCGATGTCTGGGGCACAGGGACCACGGTCACCGTC
```

Data for IgH library using new primers

```
>M01518:44:000000000-AGWM4:1:1114:8333:15960 COPY:162 mIGHV1-55*01[0] mIGHD4-1*02 mIGHJ1*03[2] mIGHM*03 ARKELGRAHWCFDV
R H G Q G P E W I G D I Y P G S G T T N Y N E K F K S K A T L T V D T S S R T V
. . . . . + . . . . . + .
aggcatggacaaggccctgagtggtgattggagataTTATCCTGGTAGTGGTACTACTAACTACAATGAGAAGTTCAAGAGCAAGGCCCACTGACTGTAGACACATCCTCCAGAACAGTC
AGGCCTGGACAAGGCCTTGAGTGGATTGGAGATATTTATCCTGGTAGTGGTAGTACTAACTACAATGAGAAGTTCAAGAGCAAGGCCCACTGACTGTAGACACATCCTCCAGCACAGCC

Y M Q L S S L T S E D S A V Y Y C A R K E L G R A H W C F D V W G T G T T V T V
. . . . . + . . . . . + .
TACATGCAGCTCAGCAGCCTGACATCTGAGGACTCTGCGGTCTATTACTGTGCAAGAAAGGAAGTGGGGCGGGCTCACTGGTGCTTCGATGTCTGgggcacagggaccacggtcaccgtc
TACATGCAGCTCAGCAGCCTGACATCTGAGGACTCTGCGGTCTATTACTGTGCAAGA AACTGGG ACTGGTACTTCGATGTCTGGGGCACAGGGACCACGGTCACCGTC
```
