# Supplementary figures and images for: Distinct mechanisms define murine B cell lineage immunoglobulin heavy chain (IgH) repertoires
Source: eLife journal article supplement (doi:10.7554/elife.09083), 2015-09-30

**Figure 1-figure supplement 1**

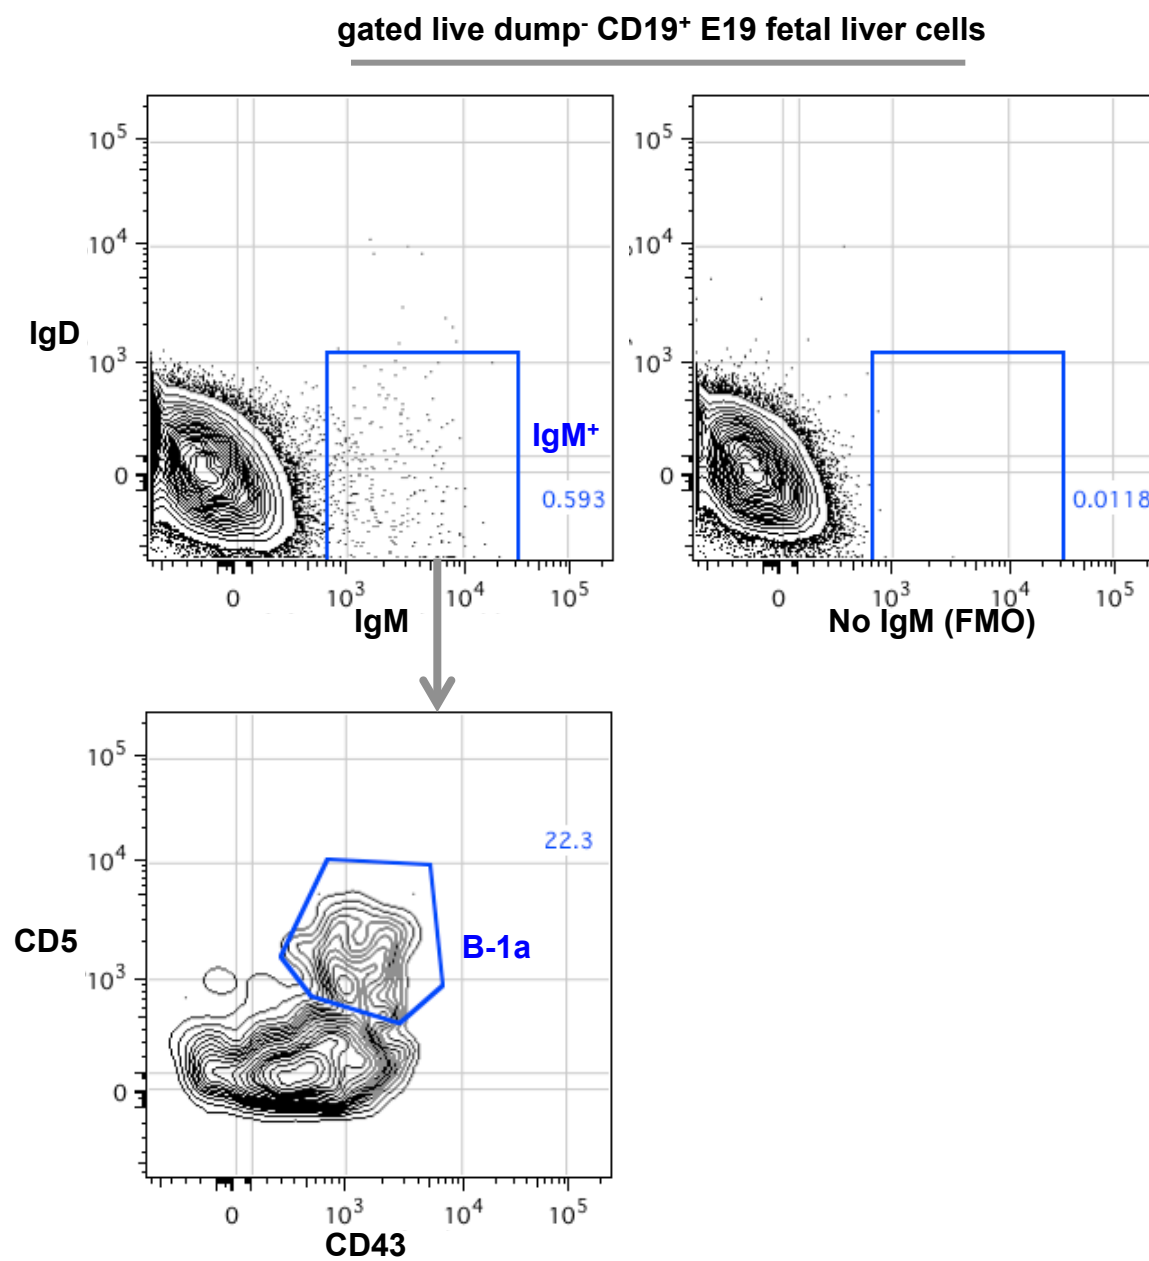

Supplement: supp [file elife_poa_e09083_Figure_1_figure_supplement_1.pdf › elife_poa_e09083_Figure_1_figure_supplement_1.pdf]

**Figure 1-figure supplement 3**

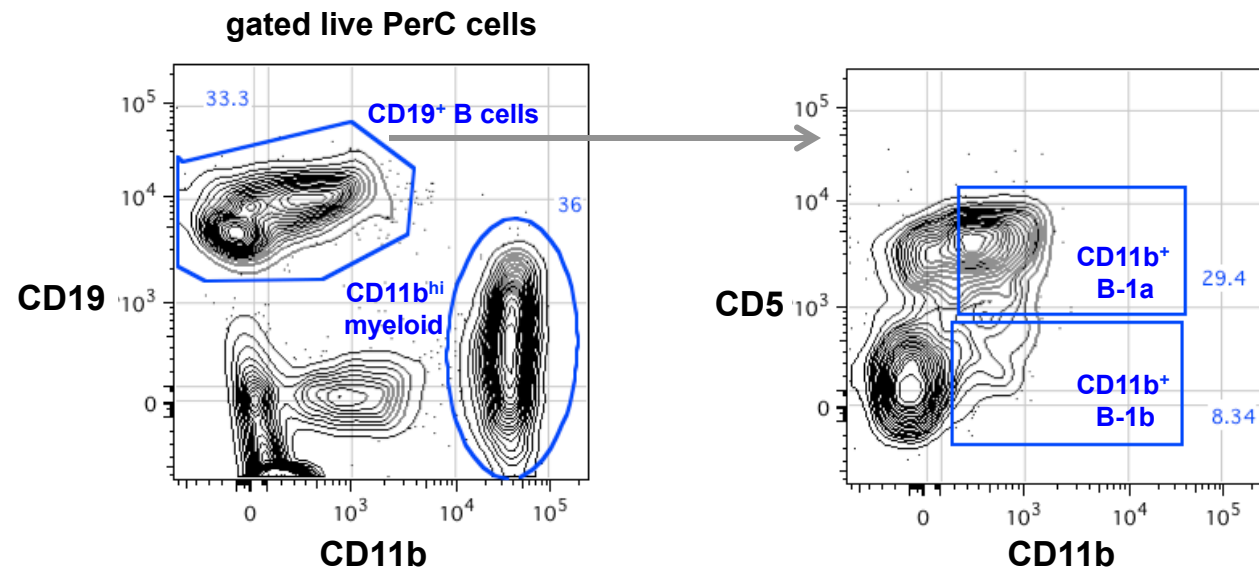

Supplement: supp [file elife_poa_e09083_Figure_1_figure_supplement_3.pdf › elife_poa_e09083_Figure_1_figure_supplement_3.pdf]

Figure 3-figure supplement 1

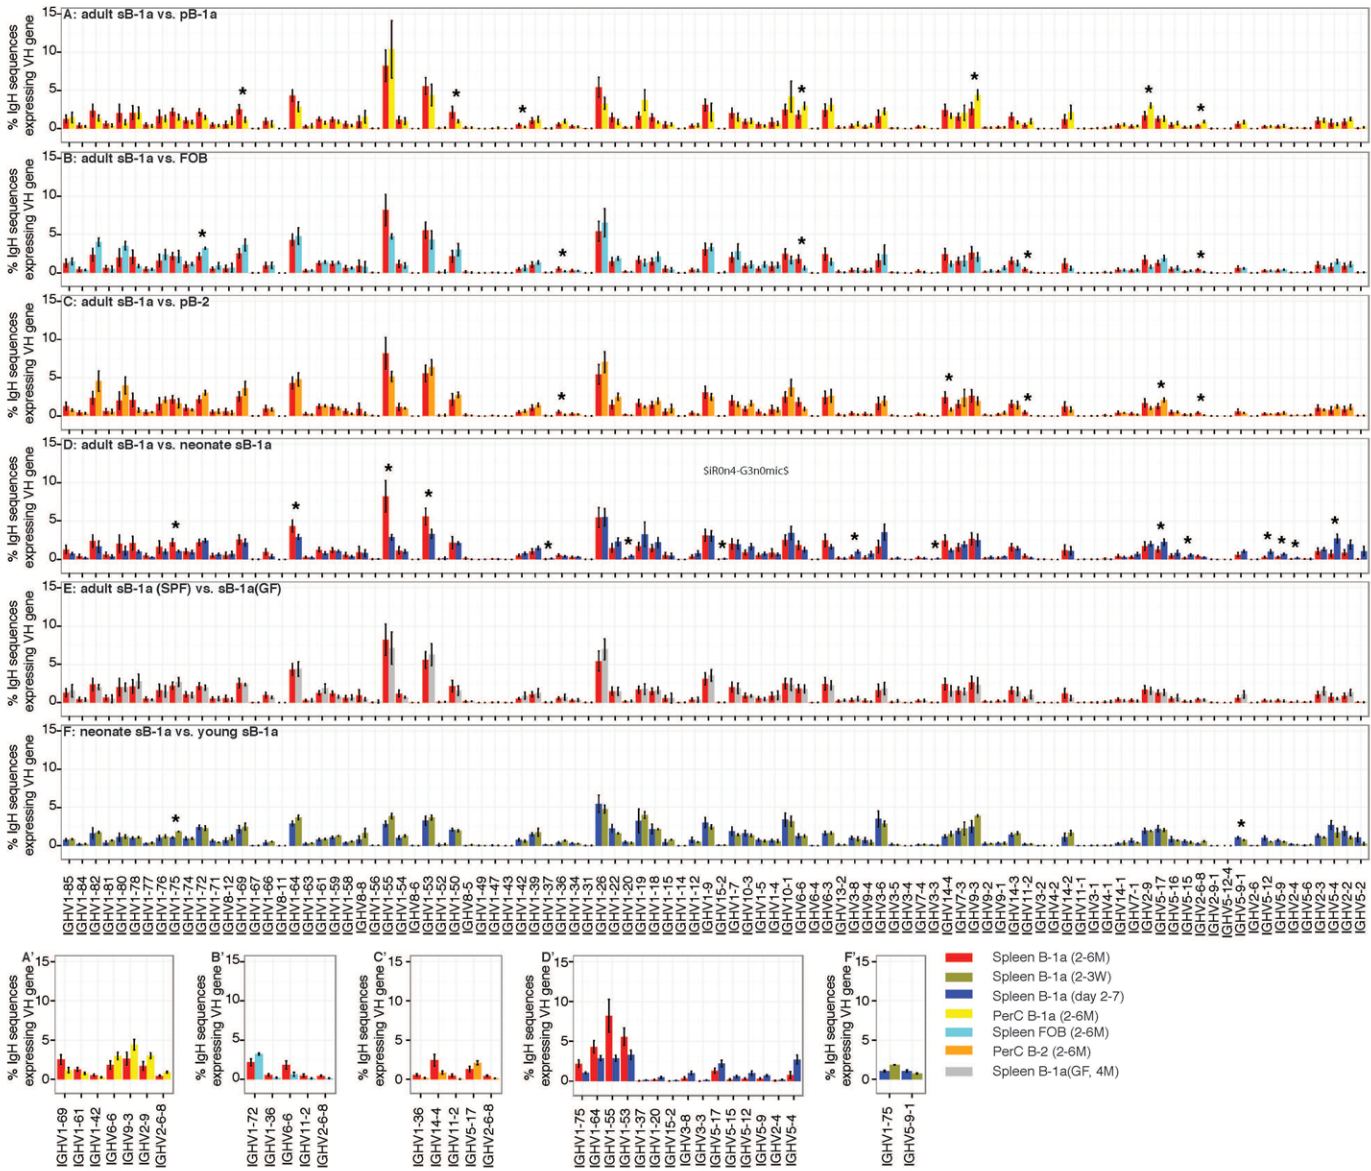

Supplement: supp [file elife_poa_e09083_Figure_3_figure_supplement_1.pdf › elife_poa_e09083_Figure_3_figure_supplement_1.pdf]

Figure 5-figure supplement 1

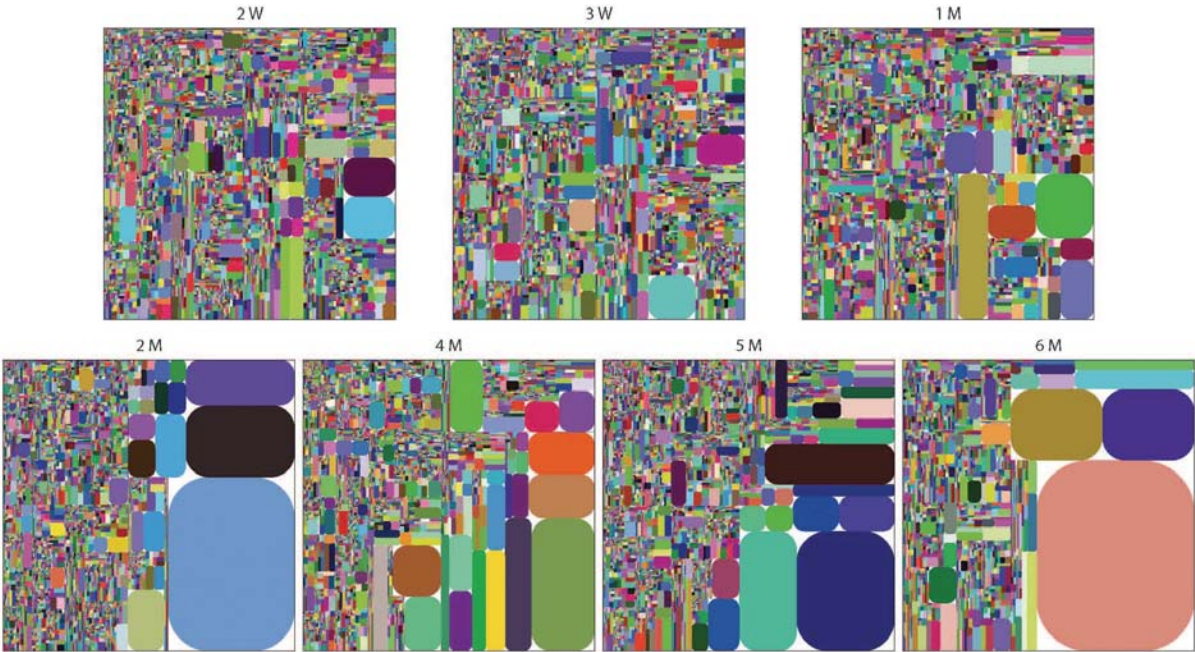

Supplement: supp [file elife_poa_e09083_Figure_5_figure_supplement_1.pdf › elife_poa_e09083_Figure_5_figure_supplement_1.pdf]

Figure 7-figure supplement 1

gated live dump<sup>+</sup> CD19<sup>+</sup> cells

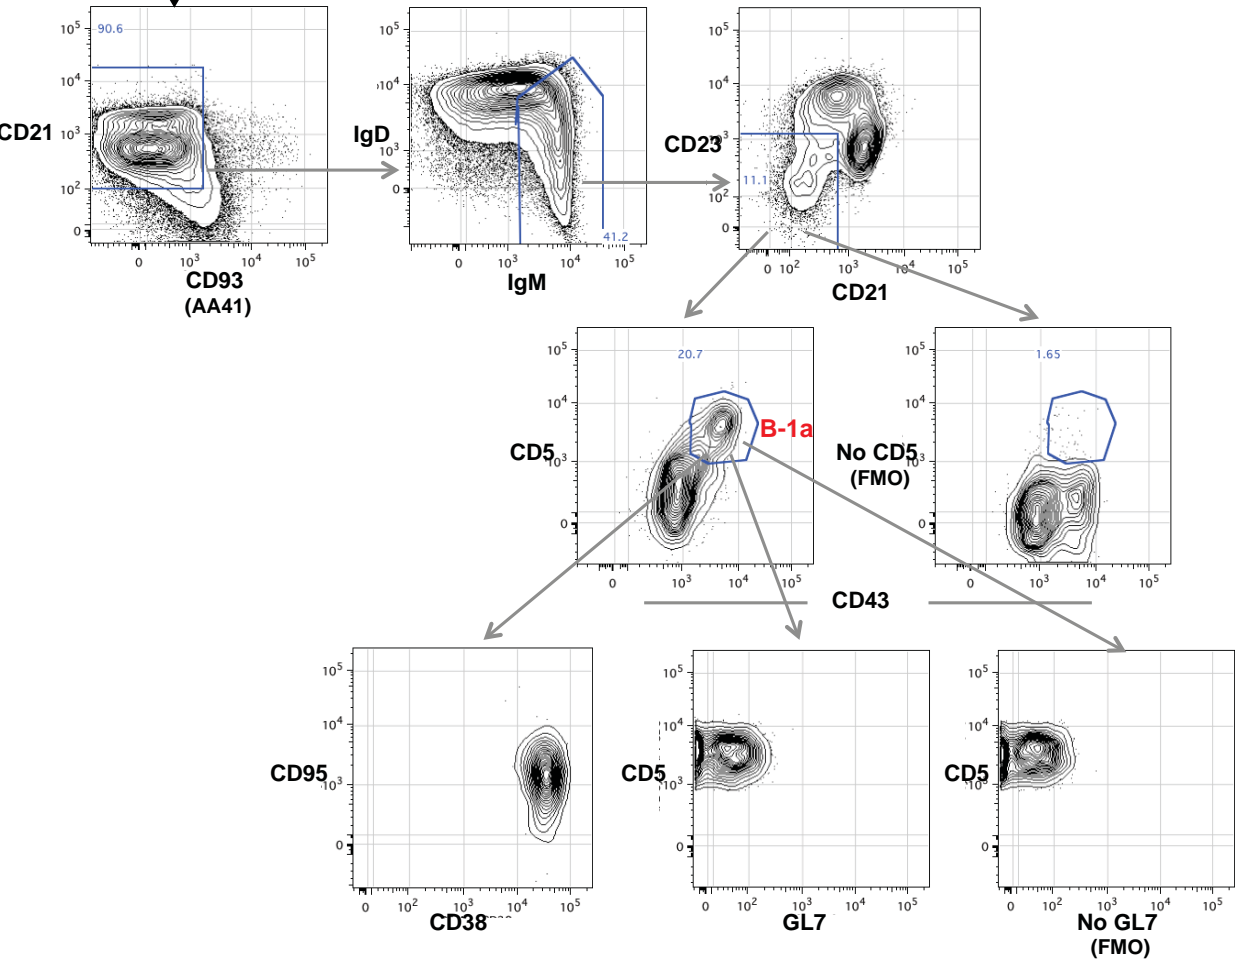

Supplement: supp [file elife_poa_e09083_Figure_7_figure_supplement_1.pdf › elife_poa_e09083_Figure_7_figure_supplement_1.pdf]

Figure 7-figure supplement 2

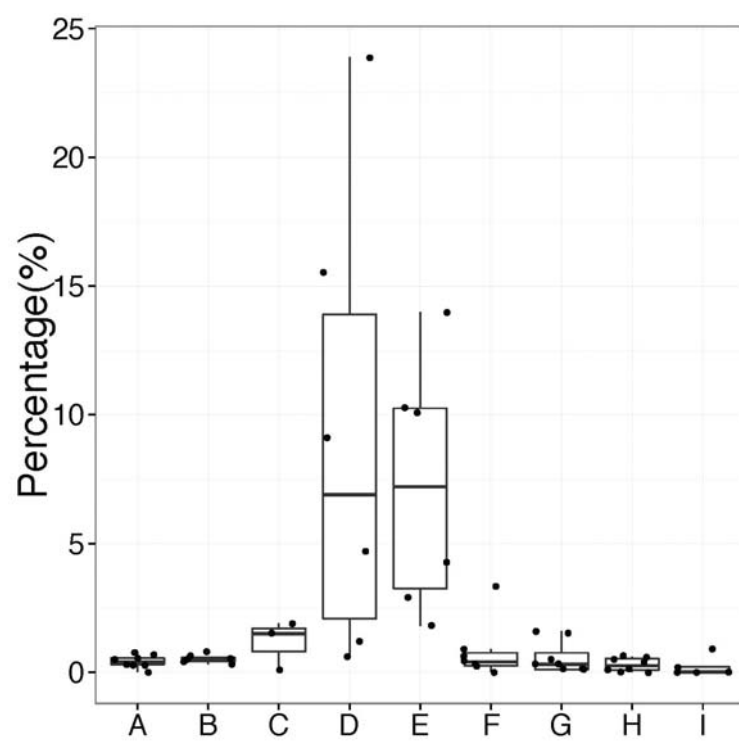

Supplement: supp [file elife_poa_e09083_Figure_7_figure_supplement_2.pdf › elife_poa_e09083_Figure_7_figure_supplement_2.pdf]

Figure 9-figure supplement 1

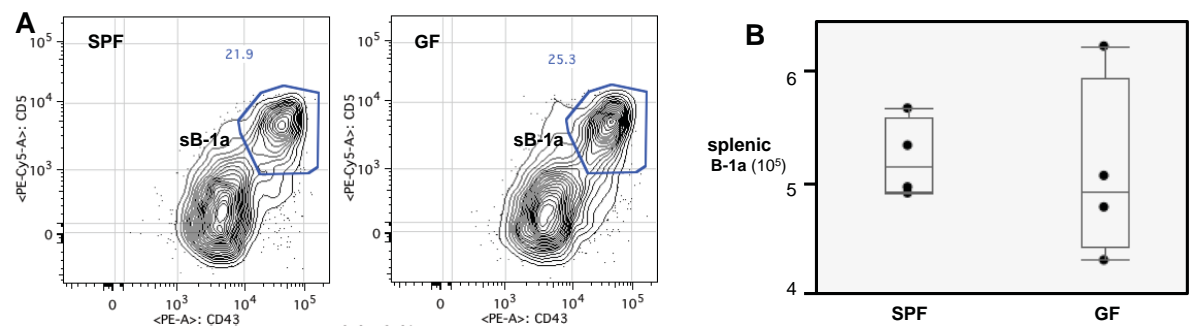

Supplement: supp [file elife_poa_e09083_Figure_9_figure_supplement_1.pdf › elife_poa_e09083_Figure_9_figure_supplement_1.pdf]
